# Supplementary material for: Iodide CIMS and m ∕ z 62: the detection of HNO 3 as NO 3 − in the presence of PAN, peroxyacetic acid and ozone
Source: Copernicus journal article supplement (doi:10.5194/amt-14-5319-2021), 2021-08-03
Supplement: Supplementary file 1 [file amt-14-5319-2021-supplement.pdf]

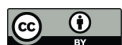

*Supplement of*

**Iodide CIMS and  $m/z$  62: the detection of  $\text{HNO}_3$  as  $\text{NO}_3^-$  in the presence of PAN, peroxyacetic acid and ozone**

**Raphael Dörich et al.**

*Correspondence to:* John N. Crowley ([john.crowley@mpic.de](mailto:john.crowley@mpic.de))

The copyright of individual parts of the supplement might differ from the article licence.

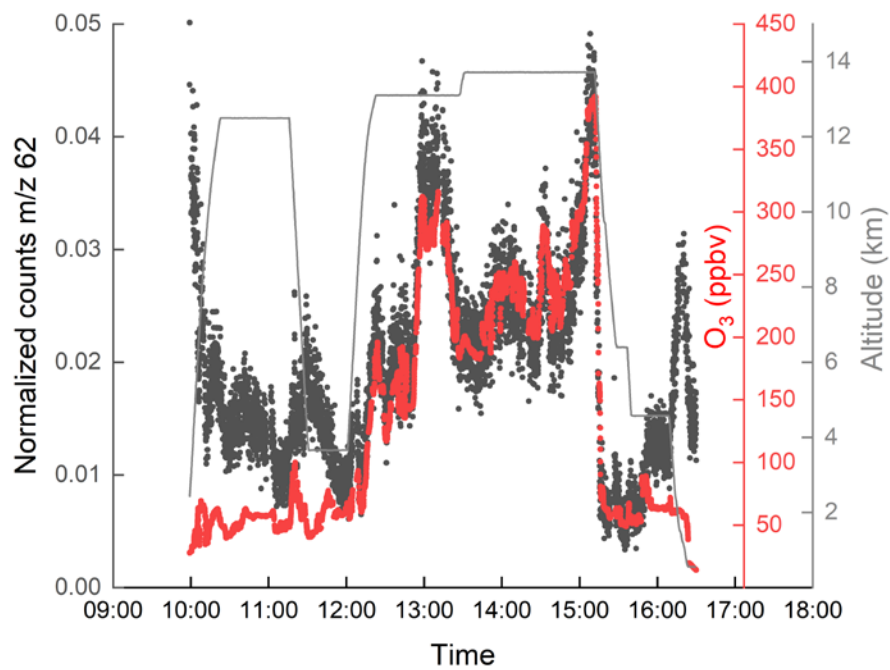

**Figure S1.** Signal at  $m/z$  62 and  $O_3$  mixing ratios during airborne operation of the I-CIMS during the HALO campaign “CAFE-Africa”.

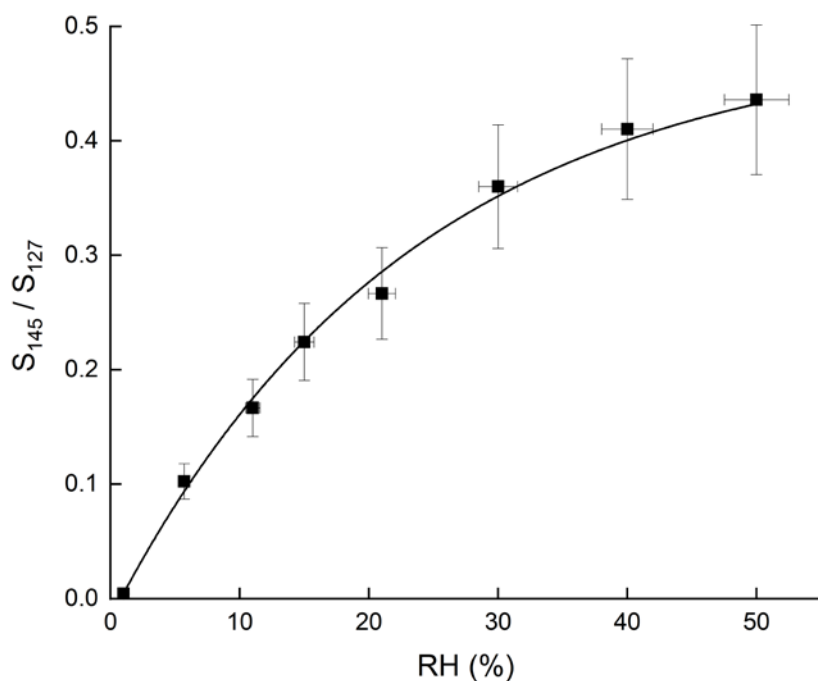

**Figure S2.** Dependence of the ion-signal ratio  $m/z$  145 /  $m/z$  127 (corresponding to  $I(\text{H}_2\text{O})$  and  $I^-$ , respectively) on the degree of humidification of zero-air entering the inlet. The relative humidity (RH) was monitored with a hygrometer (Testo 625) at a pressure of 1 bar and a temperature of 298 K. The regression line is:  $\text{RH} = -24.616 \ln\{0.969 - (1.923 \times S_{145} / S_{127})\}$ .

Using the expression above RH can be converted to a mixing ratio (MR), pressure (P, in mbar) or concentration (C, in molecule  $\text{cm}^{-3}$ ) of  $\text{H}_2\text{O}$  in the IMR via:

$$\text{MR} = \frac{\left(\frac{\text{RH}}{100} \times 31.7\right)}{1000} \times \frac{1200}{2000}$$

where 31.7 is saturation vapour pressure (mbar) of  $\text{H}_2\text{O}$  at 298 K, 1000 is ambient pressure (mbar), 1200 and 2000 are the humidified and total flows (in sccm), respectively into the IMR.

$$P(\text{H}_2\text{O}) = \text{MR} \times 24$$

Where 24 is the pressure (in mbar) in the IMR

$$C(\text{H}_2\text{O}) = P(\text{H}_2\text{O}) \times 2.43 \times 10^{16}$$

Where  $2.43 \times 10^{16}$  is a conversion factor for mbar into molecule  $\text{cm}^{-3}$  at 298 K

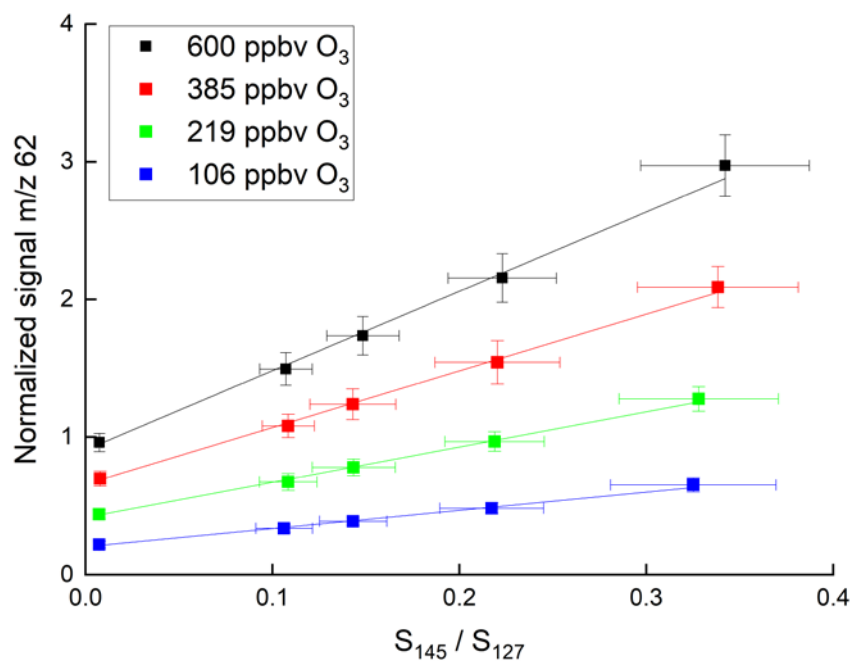

**Figure S3.** Dependence of the signal at  $m/z$  62 from 38.5 ppb of  $HNO_3$  on the amount of  $H_2O$  in the IMR (as indicated by the ratio of signals of  $I^-$  ( $m/z$  127) and its water cluster ( $m/z$  145)). The error bars are  $1\sigma$  statistical uncertainty in the signal at  $m/z$  62,  $m/z$  127 and  $m/z$  145

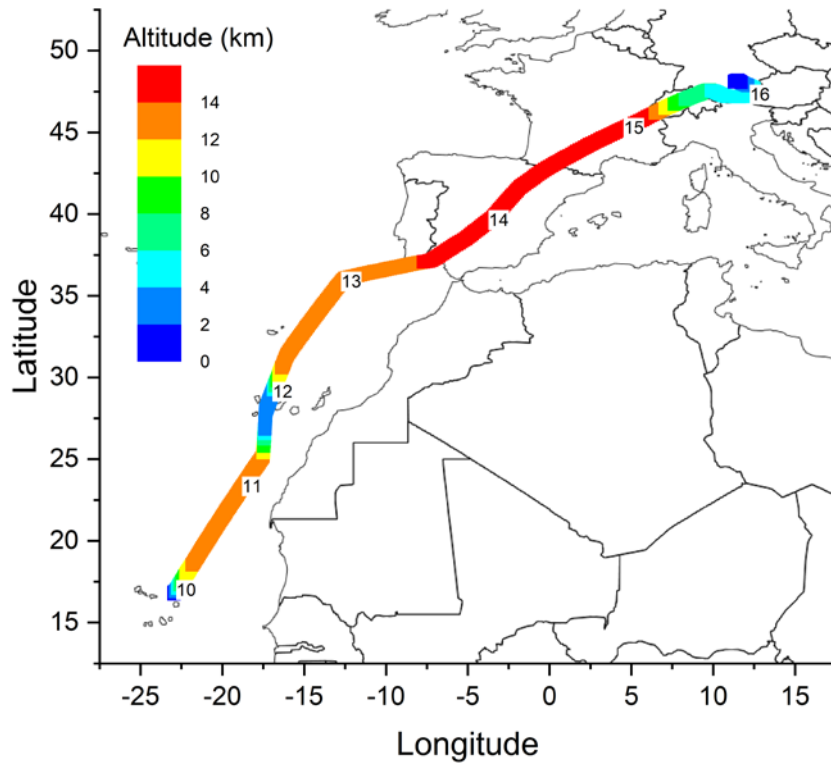

**Figure S4.** Flight track (colour coded with altitude) during the return leg (Cap Verde Islands to Oberpfaffenhofen) of the HALO-campaign “CAFE-Africa”. The numbers on the track indicate the time (UTC).

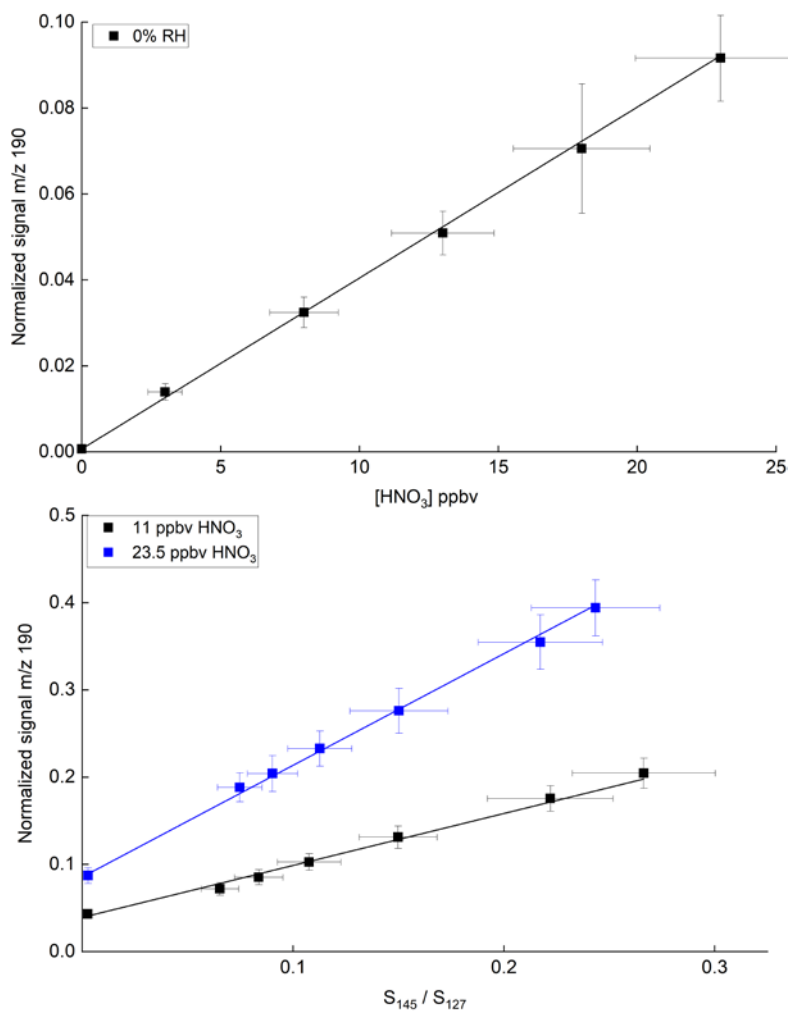

**Figure S5.** Upper panel: Dependence of the signal at  $m/z$  190 due to the  $\text{I}(\text{HNO}_3)$  cluster on the  $\text{HNO}_3$  mixing ratio. Lower panel: Dependence of the signal at  $m/z$  190 on the relative humidity ( $S_{145}/S_{127}$ ).

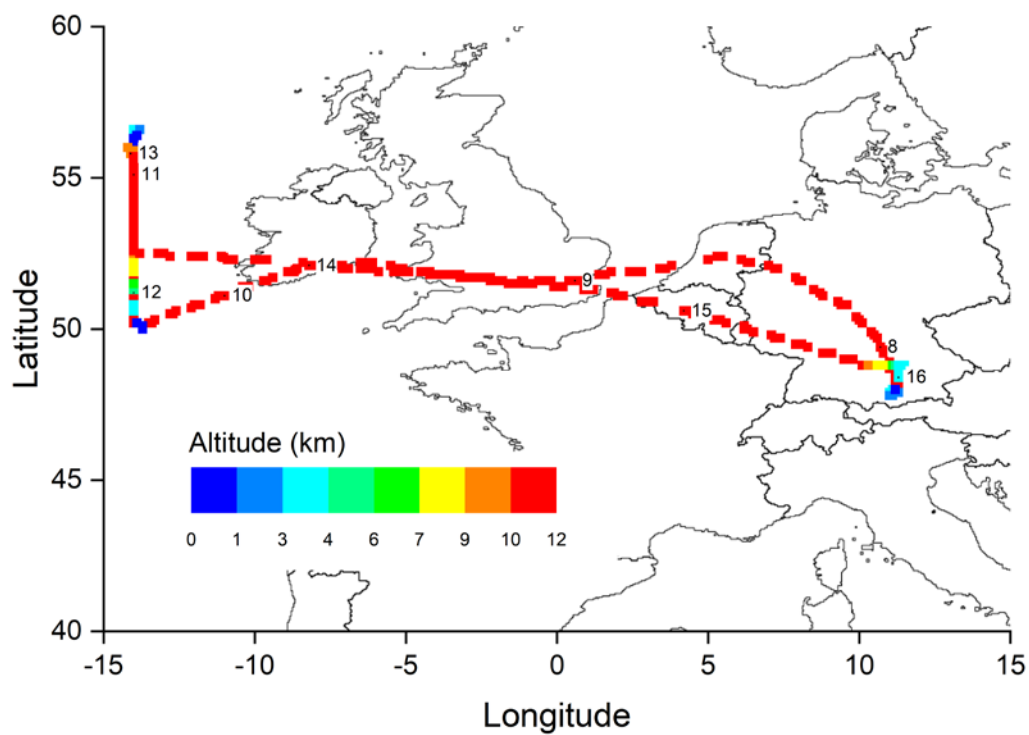

**Figure S6.** Flight track (colour coded with altitude) during a flight (30.05.2020) over Europe of the HALO-campaign “CAFE-EU”. The numbers on the track indicate the time (UTC).
